# Supplementary material
Source: PubMed Central journal article supplement (PMC3436187)
Supplement: supp_M112.351239_jbc.M112.351239-1.pdf [file supp_M112.351239_jbc.M112.351239-1.pdf]

## SUPPLEMENTAL FIGURES

**SUPPLEMENTAL FIGURE S1. TLT-1 Overexpression reduced the formation of osteoclasts in RAW 264.7 cells.** A. RAW 264.7 cells were transfected with pMX or pMX-TLT-1 constructs. Cells were cultured with RANKL for 2 days and the protein level of TLT-1 was detected by Western blotting. B. TLT-1 transfected RAW 264.7 cells were differentiated with RANKL for 4 days before TRAP staining.

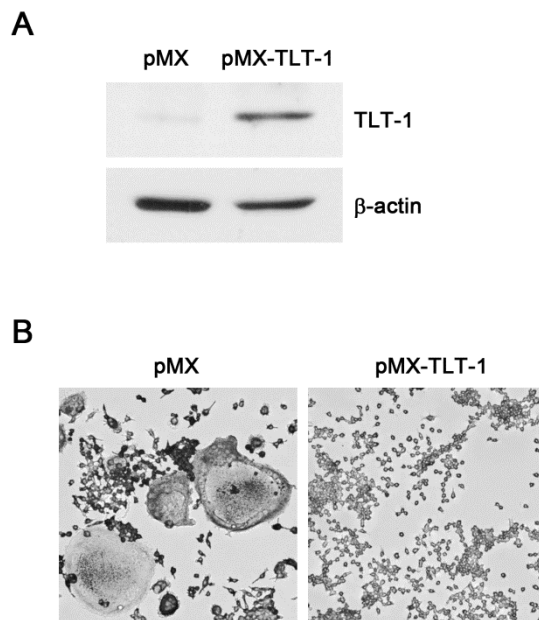

Supplemental Figure S1
